# Supplementary material for: Impaired CD4+ T cell help through the CD40L-CD40 pathway contributes to reduced tumor control in males
Source: Research Square preprint supplement (doi:10.21203/rs.3.rs-6568498/v1), 2025-05-16
Supplement: Supplementary file 1 [file b37432cd3e399d513a775c2c.docx]

**
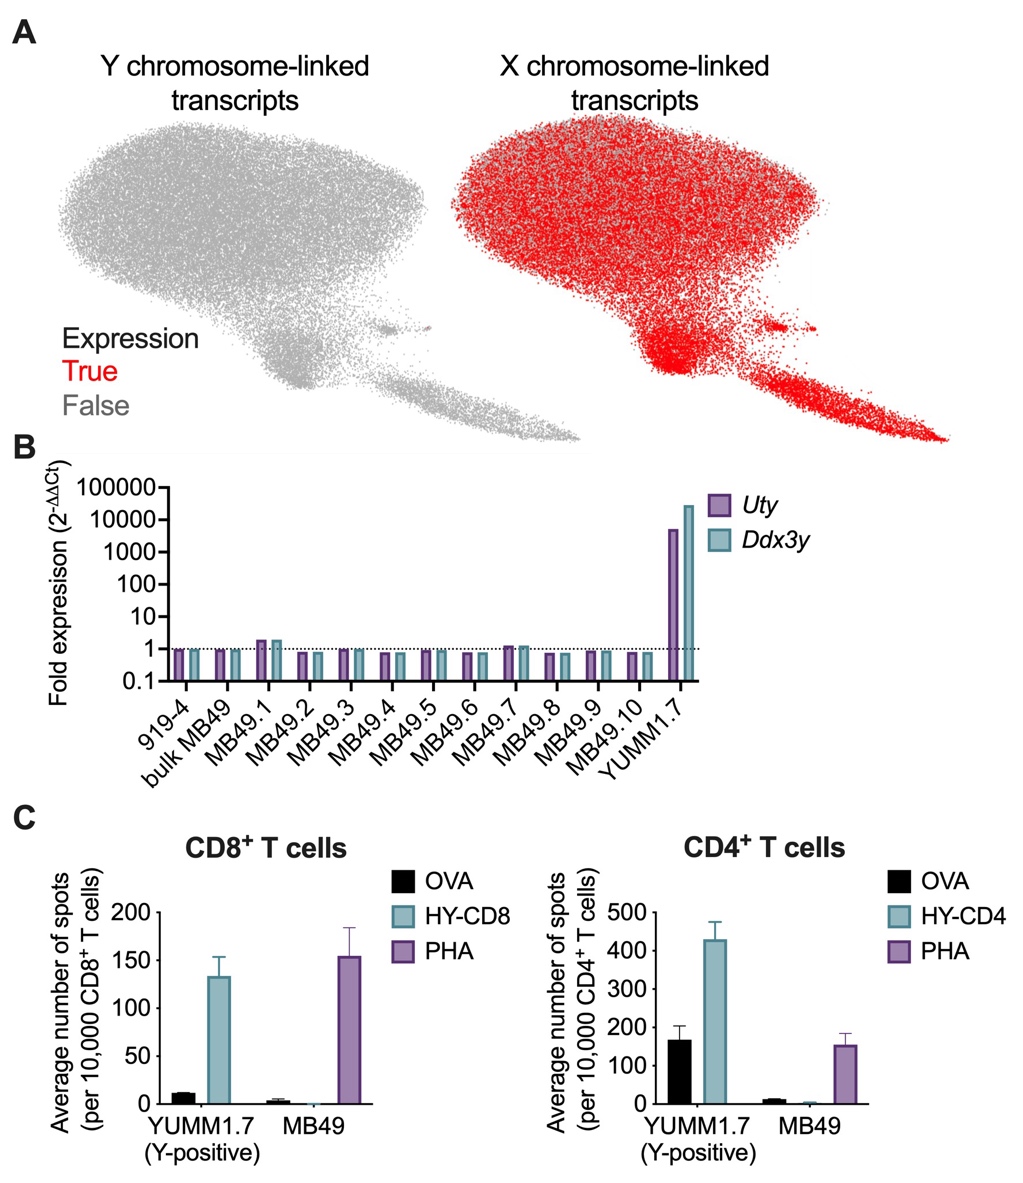
**

**Fig. S1. MB49 tumor cells do not elicit immune responses against the Y chromosome. (A)** 58,045 MB49 cells were analyzed by scRNAseq. UMAP plots are shown overlaid with the expression level of Y chromosome-linked (left) and X chromosome-linked (right) transcripts. Red indicates cells expressing sex chromosome-linked transcripts while grey indicates cells not expressing sex chromosome-linked transcripts. **(B)** Gene expression analysis of Y chromosome-encoded *Uty* and *Ddx3y* transcripts in parental MB49 and 10 independent MB49 single cell clones. The female-derived MCA-induced sarcoma 919-4 was used as a negative control to which *Uty* and *Ddx3y* transcript expression was compared using the 2-ΔΔCt method. The male-derived YUMM1.7 melanoma cell line was used as a positive control. **(C)** Female C57BL/6 mice were implanted with YUMM1.7 (Y chromosome-positive) or MB49 tumor cells and CD8+ and CD4+ T cells were isolated 14 days later using magnetic bead enrichment. IFNγ production following T cell stimulation with the major MHC-I (left) and MHC-II (right) restricted male-specific histocompatibility antigens (HY) was evaluated using ELISPOT assay. Stimulation with OVA peptide was used as a negative control. Data are presented as mean number of spots ± SEM from 3 independent tumors.


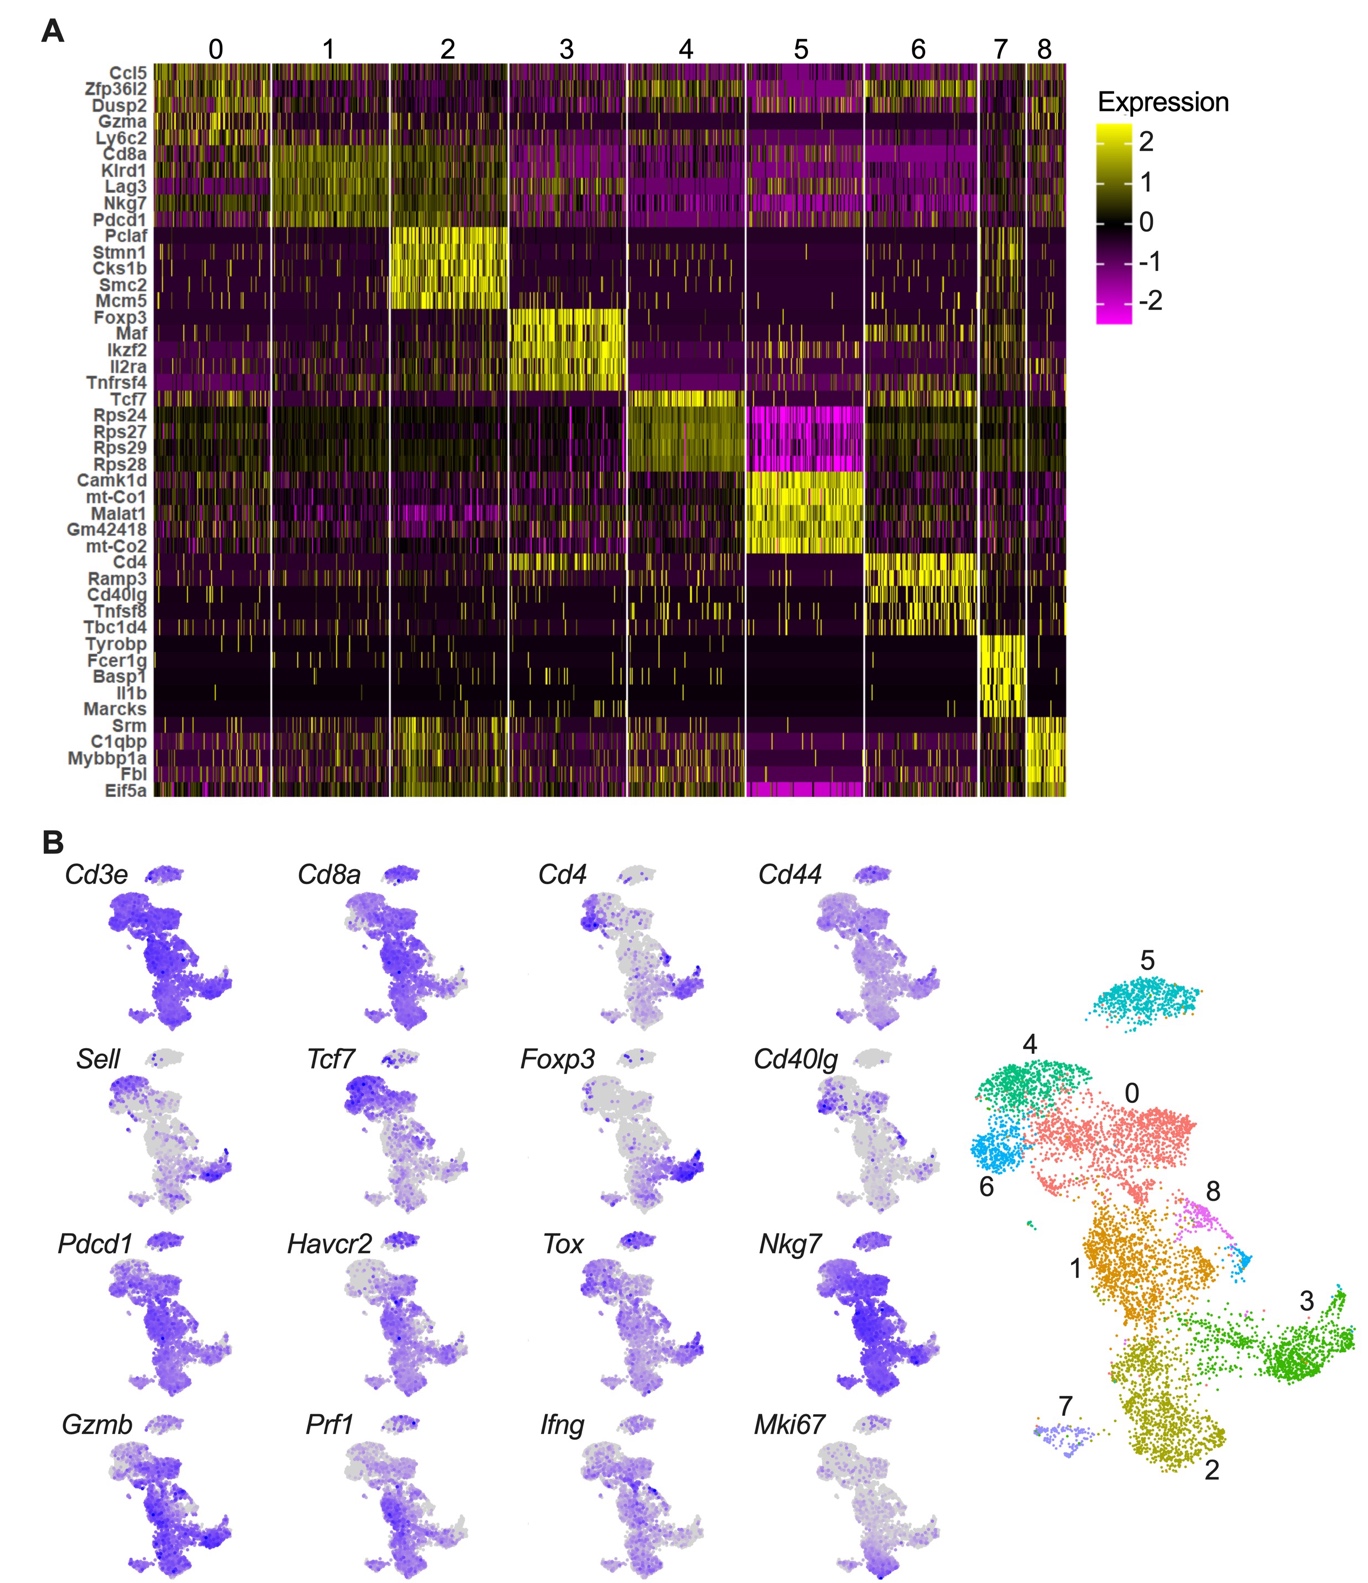


**Fig. S2. MB49 tumors display sex differences in T cell phenotypes. (A)** Heatmap displaying the expression level of the top 5 most differentially upregulated genes from CD4+ and CD8+ T cell clusters identified by scRNAseq analysis of cells infiltrating MB49 tumors. **(B)** UMAP plots of MB49-infiltrating CD4+ and CD8+ T cells overlaid with the expression level of the indicated transcripts.

**
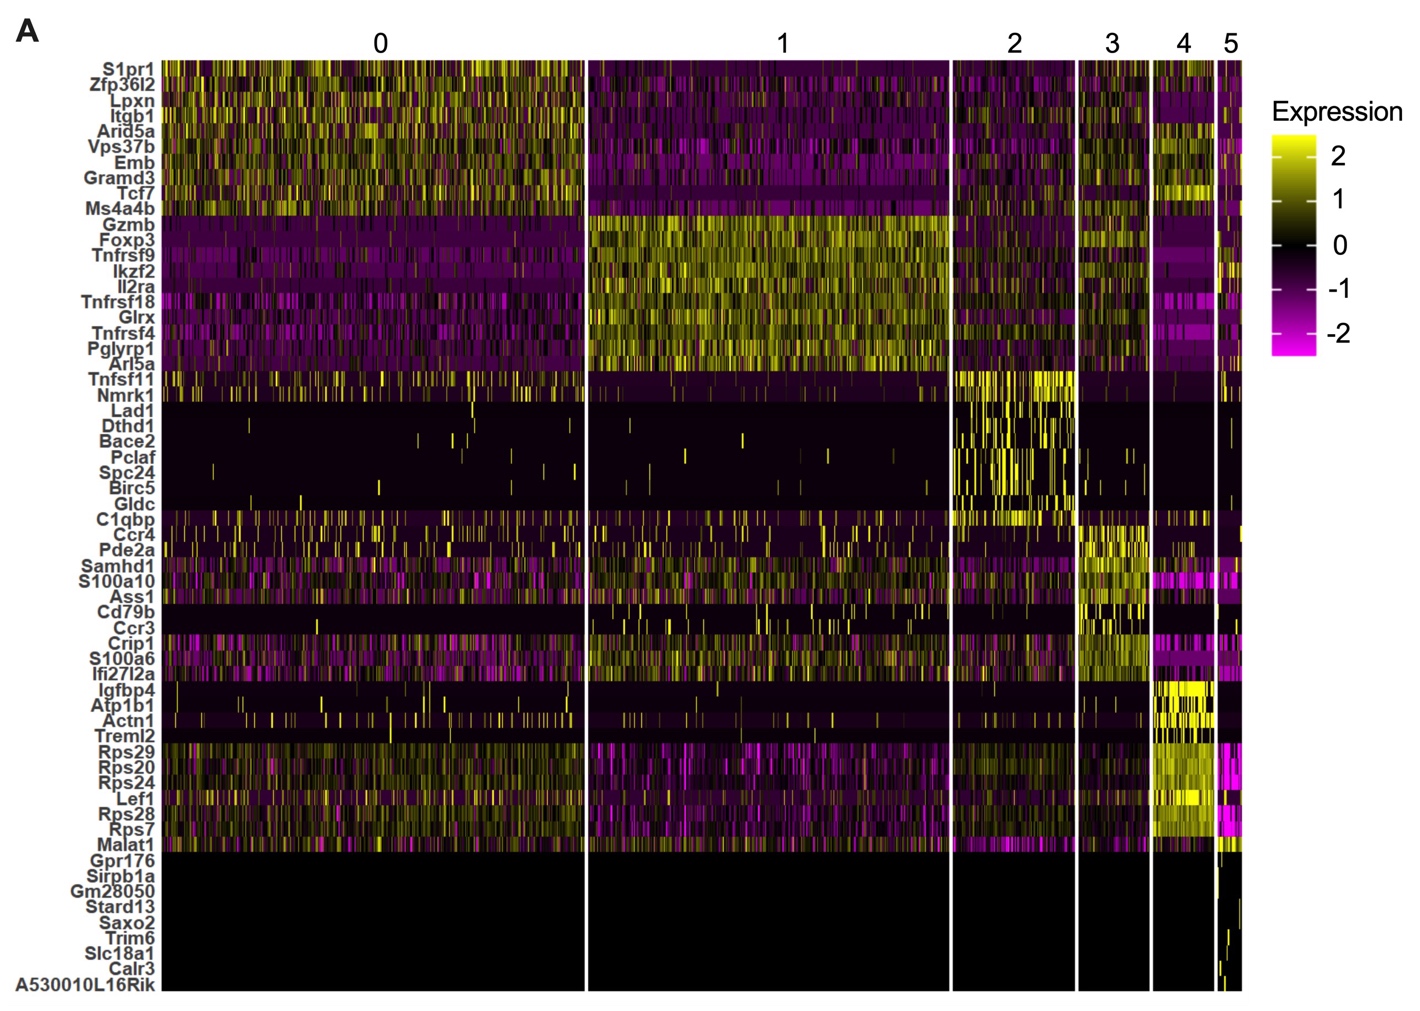
**

**Fig. S3. CD4+ T cells from MB49 tumors show sex-based phenotypic differences.** Heatmap displaying the expression level of the top 7 most differentially upregulated genes from CD4+ T cell clusters identified by scRNAseq analysis of cells infiltrating MB49 tumors.

**
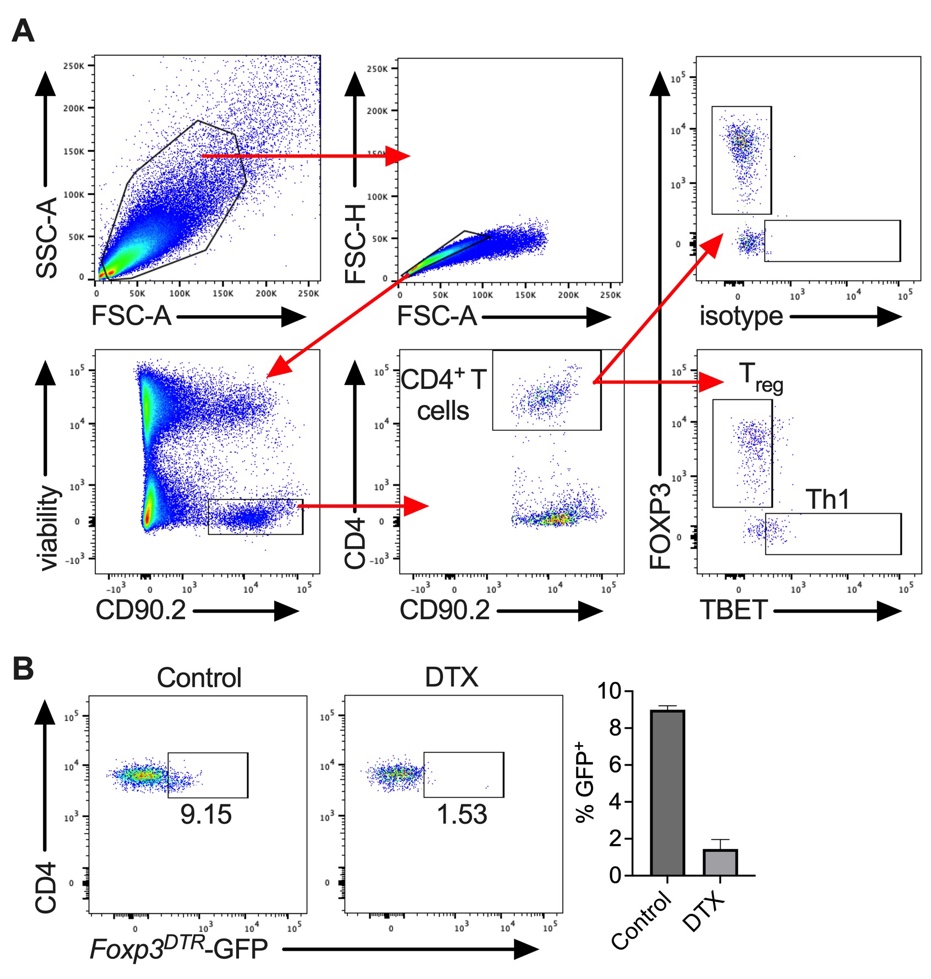
**

**Fig. S4. Flow cytometry analysis of CD4+ T cells. (A)** Gating strategy of flow cytometry analysis of tumor-infiltrating CD4+ T cells. **(B)** Flow cytometry analysis of *Foxp3DTR* mice treated with vehicle control or diphtheria toxin (DTX). Cells were previously gated on viable, CD90.2+CD4+ population.

**
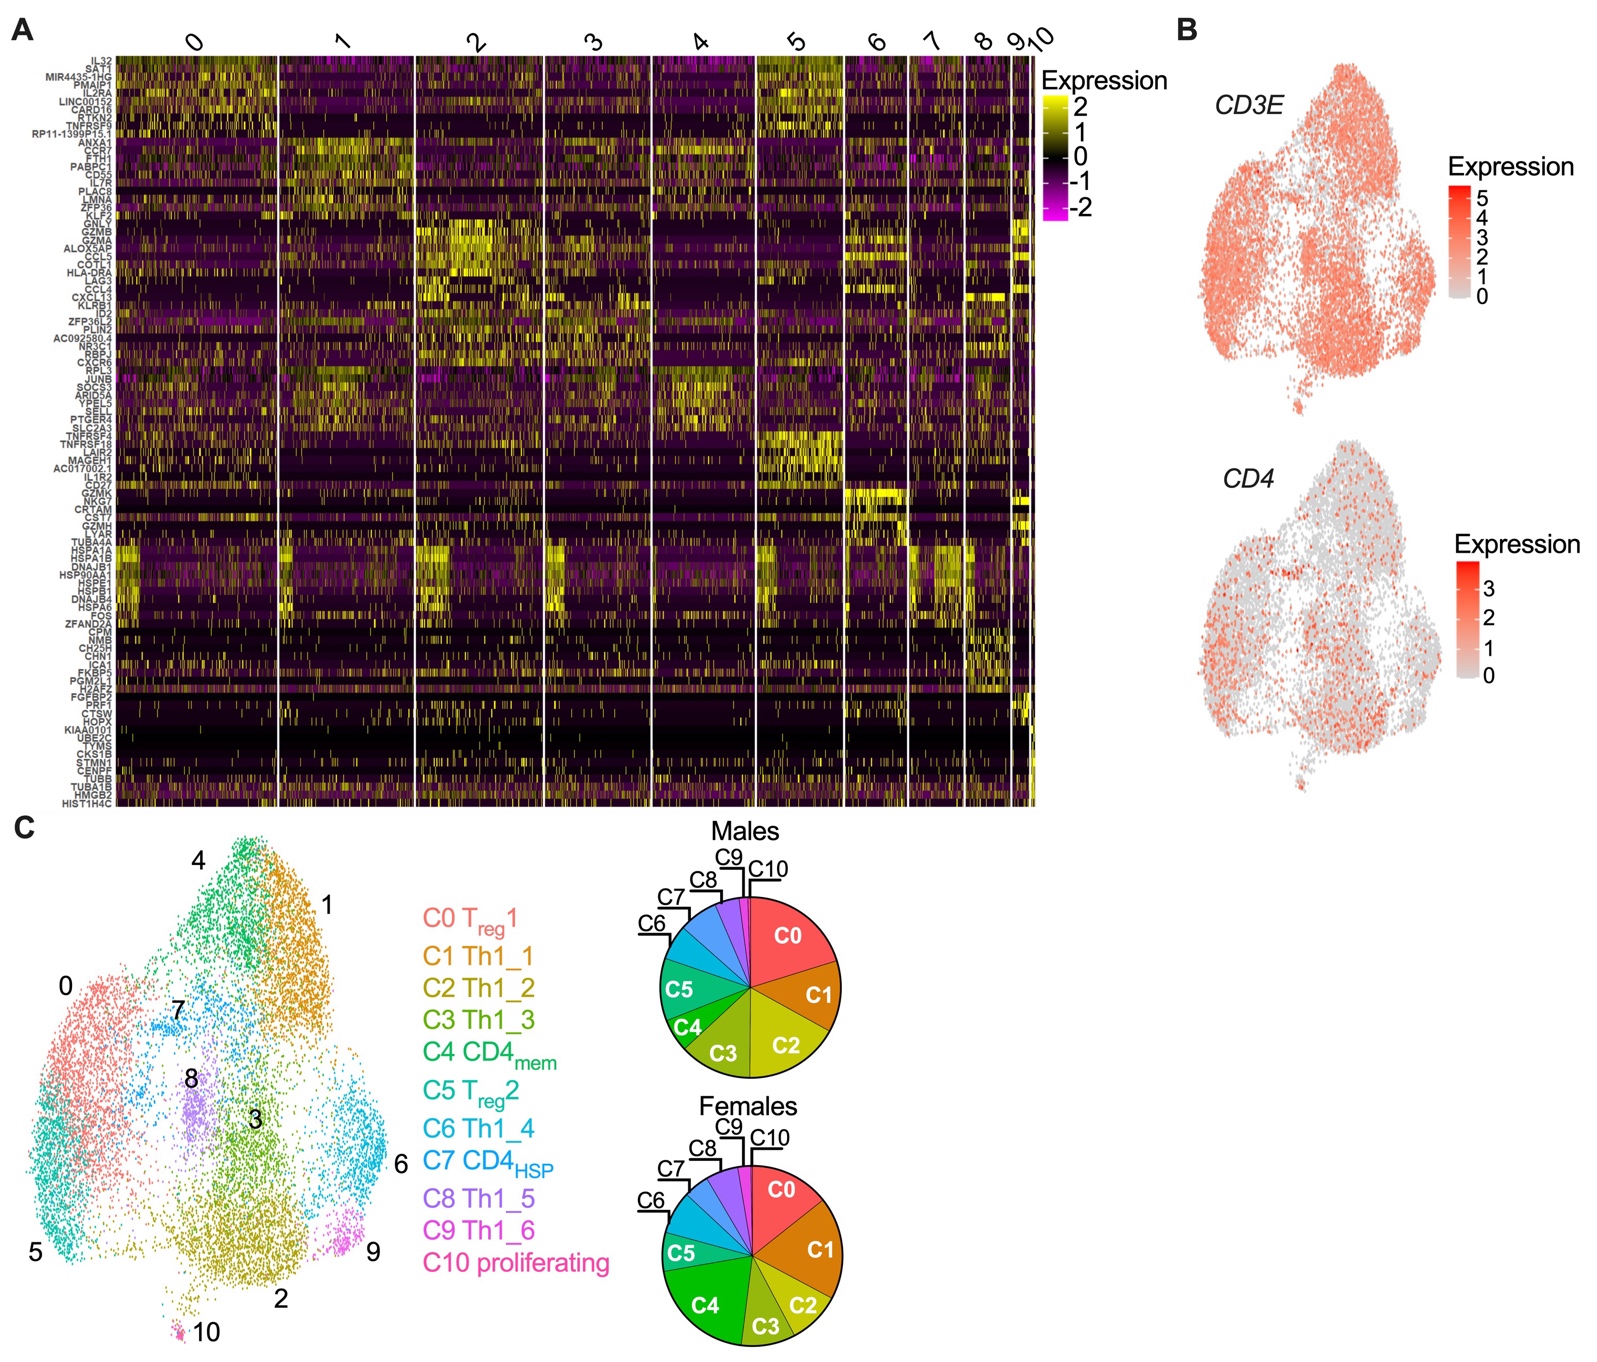
**

**Fig. S5. Sex-based differences in CD4+ T cells infiltrating human bladder tumors.** **(A)** Heatmap displaying the expression level of the 10 most differentially upregulated genes from CD4+ T cell clusters identified by scRNAseq analysis. **(B)** UMAP plots of CD4+ T cells isolated from human bladder tumors overlaid with the expression of *CD3E* (top) and *CD4* (bottom). **(C)** UMAP plots as in (B) are colored to show cluster boundaries. Pie charts on right show the proportion of male- and female-derived CD4+ T cells present within each cluster.


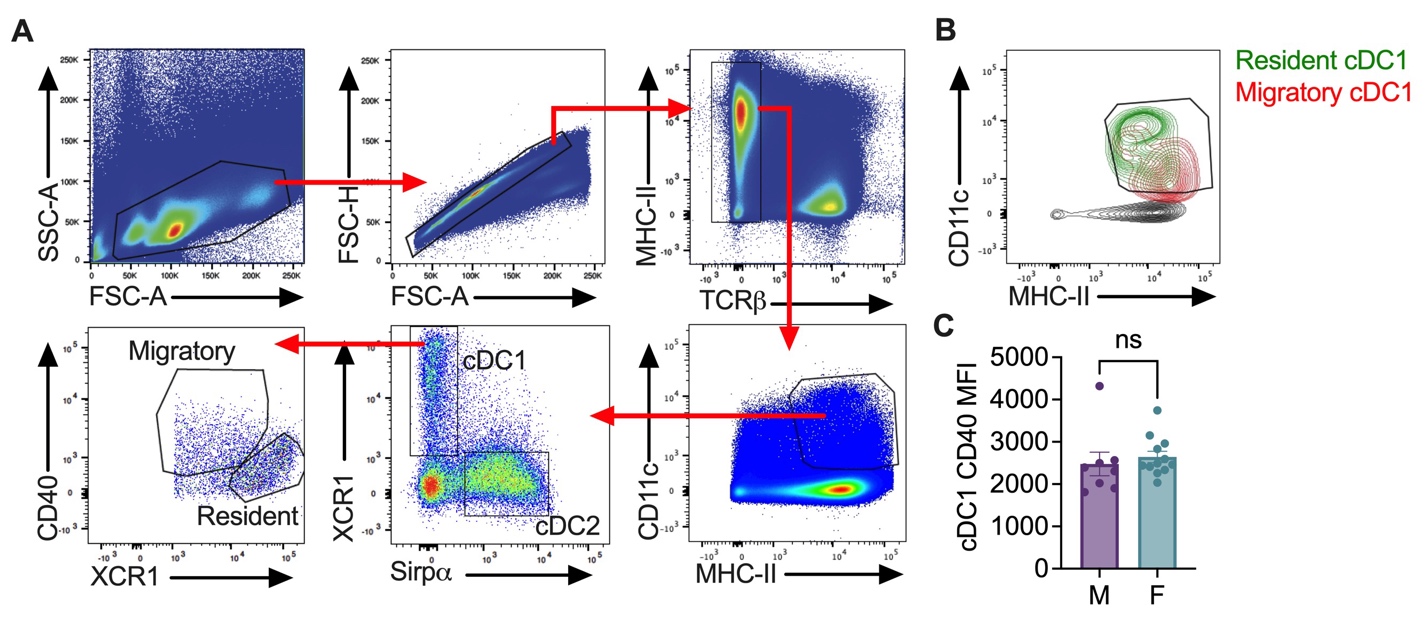


**Fig. S6. cDC1s from MB49 tumor-bearing male and female mice display equivalent expression levels of CD40**. **(A)** Gating strategy used for flow cytometry analysis of dendritic cells within tumor-draining lymph nodes. **(B)** Resident and migratory cDC1 populations as gated in A overlaid to show CD11c and MHC-II expression. **(C)** Quantification of flow cytometry analysis of migratory cDC1s in male- and female-derived MB49 tdLNs. Data are shown as mean migratory cDC1 CD40 MFI ± SEM from 8 males and 12 females from 3 independent experiments. ns: non-significant, p>0.05. p value calculated using unpaired, two-tailed t test.


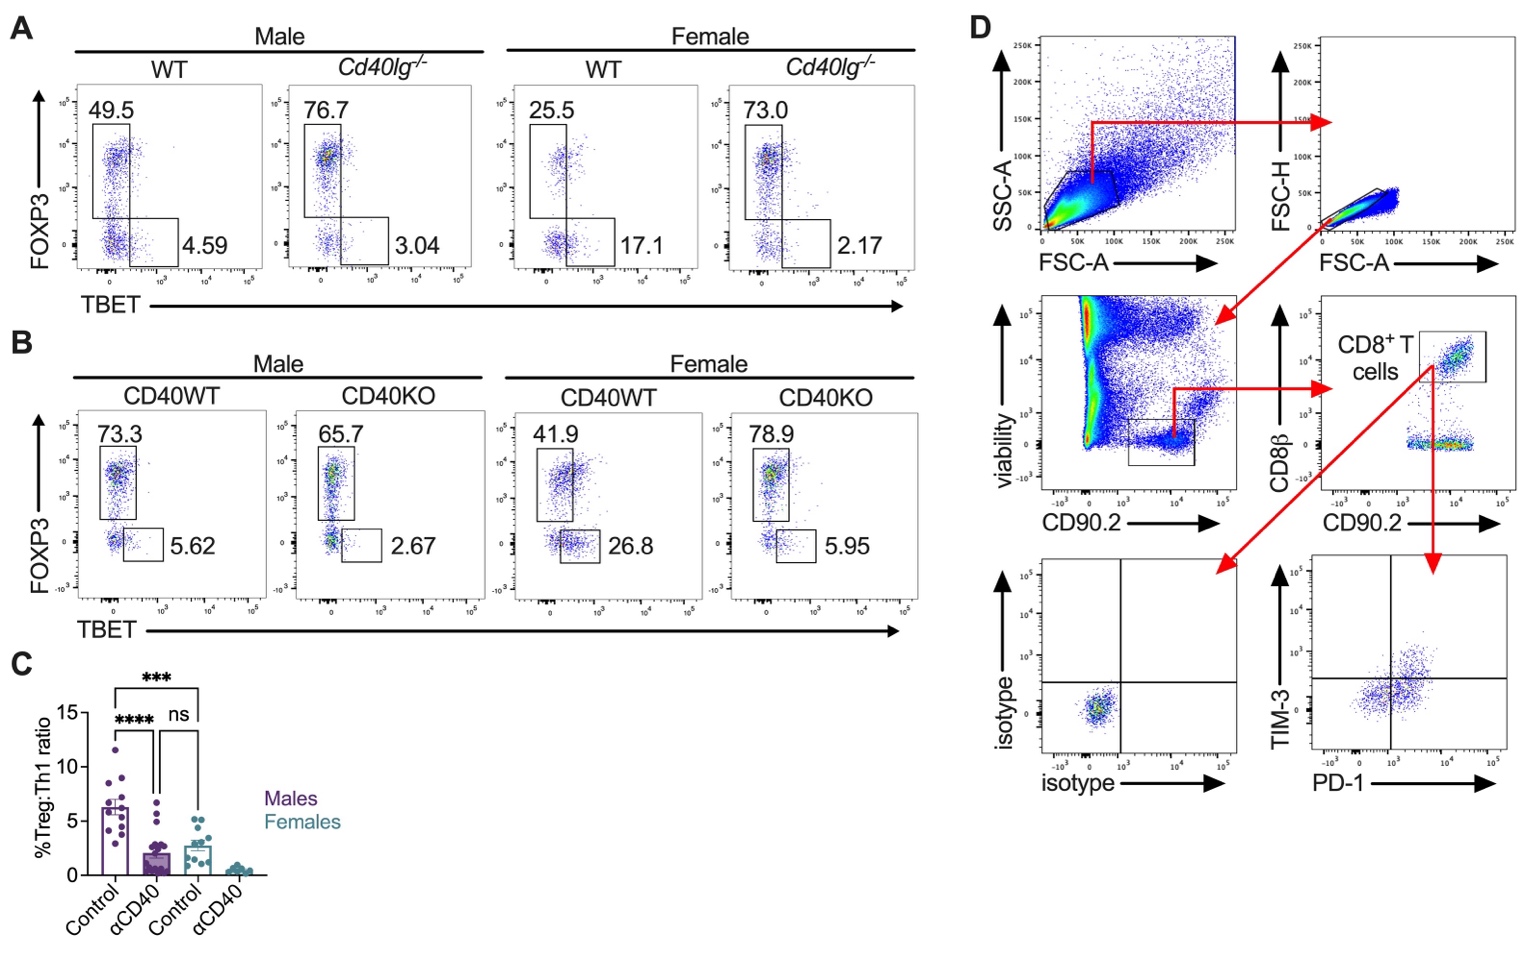


**Fig. S7. Modulation of CD40L-CD40 signaling impacts both CD4+ and CD8+ T cell function. (A, B)** Representative flow cytometry analysis of CD4+ T cells isolated from MB49 tumors implanted in male and female WT or *Cd40lg-/-* mice (A), or male and female cDC1CD40WT or cDC1CD40KO mice (B). Cells were previously gated on viable, CD90.2+CD4+ population. **(C)** Quantification of the Treg:Th1 CD4+ T cell ratio measured by flow cytometry analysis of MB49 tumor-bearing mice treated with control IgG or agonistic αCD40 antibody. Data are shown as mean Treg:Th1 CD4+ T cell ratio ± SEM from 7-18 tumors per cohort from 4 independent experiments. **(D)** Gating strategy for flow cytometry analysis of tumor-infiltrating CD8+ T cells. ns, non-significant, p>0.05; ***, p≤0.001; ****, p<0.0001. p values calculated using 2-way ANOVA with Bonferroni correction for multiple comparisons.
